# Supplementary material for: IAEA compiling state of knowledge and developing high level guidance in radioactive waste management
Source: Copernicus journal article supplement (doi:10.5194/sand-1-257-2021), 2021-11-10
Supplement: Supplementary file 1 [file sand-1-257-2021-supplement.pdf]

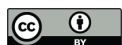

*Supplement of*

## **IAEA compiling state of knowledge and developing high level guidance in radioactive waste management**

**Stefan Mayer and Rebecca Robbins**

*Correspondence to:* Stefan Mayer ([s.j.mayer@iaea.org](mailto:s.j.mayer@iaea.org))

The copyright of individual parts of the supplement might differ from the article licence.

## IAEA Waste Technology Section

Capturing State of Knowledge and developing high level  
guidance in Radioactive Waste Management

**Rebecca Robbins & Stefan Mayer**  
**IAEA – NE Department - Waste Technology Section**

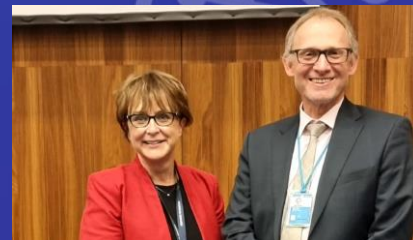

safeND Research Symposium, November 2021

# IAEA activities that support global cooperation in RWM

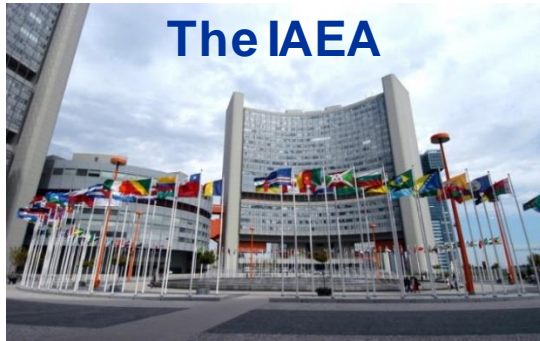

Established in 1957 - 172 Member States  
~ 2,560 multidisciplinary professional and support staff from more than 100 countries

Range of mechanisms to elicit, capture, assess, synthesize, structure and transfer knowledge

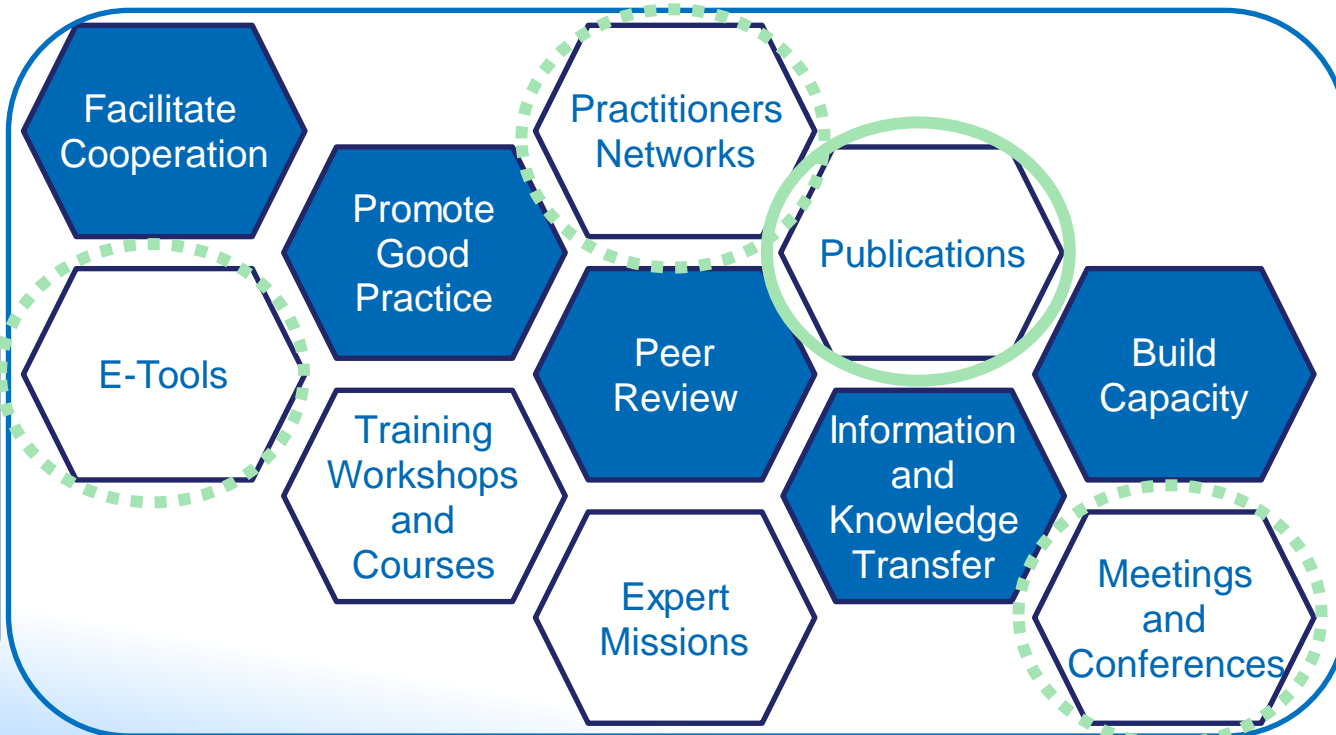

## Prior to focusing on KM of RWM - ...

### ... - What is it?

- ✓ Depends on scope & purpose
- ✓ Tool for consistency & continuity including transfer of knowledge
- ✓ Elicit and synthesize good practices on the overall strategy, programmatic needs, the various steps and associated technologies of RWM
- ✓ Elicit the framework that allows to capture all relevant K-topics for RWM in a structured and comprehensive manner

### ... - What is it for?

- ✓ To effectively transfer to peers & "the future"
- ✓ To work with a reference base of knowledge
- ✓ A starting point for innovation & optimization

### ... - What is specific to RWM-KM?

- ✓ No "industry reference" for RWM framework
- ✓ Limited experience with "full" national RWM
- ✓ Unusual time scales of disposal programs

# Capturing Knowledge – Sustained interaction with “where K is” Professional Networks - [link](#)

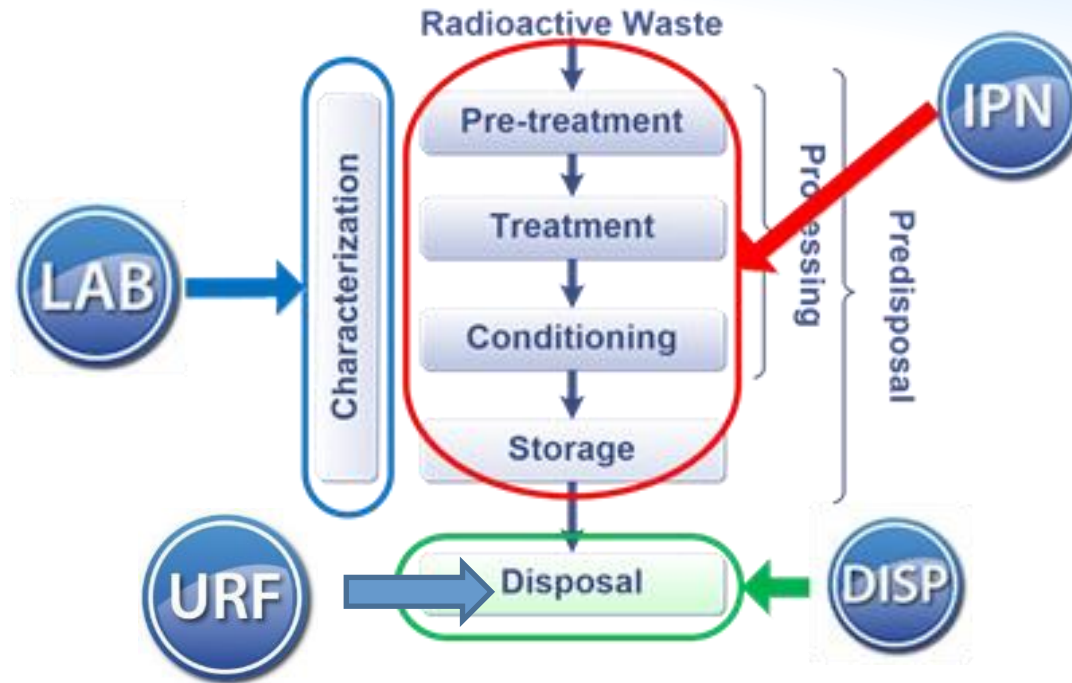

Noting also the specifics of RWM for Disused Sealed Radioactive Sources

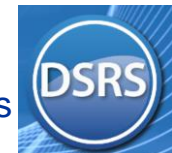

# Capturing Knowledge – Comprehensive global status

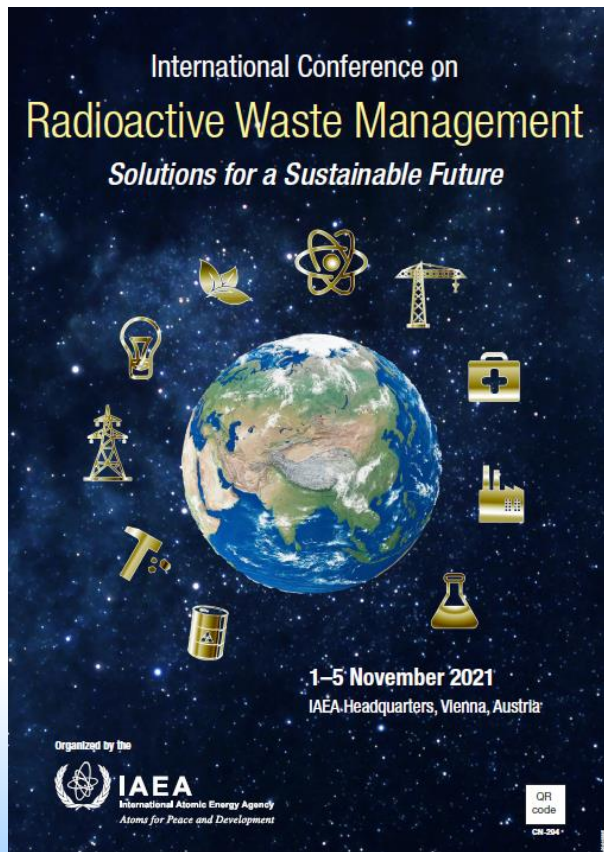

Conference Website:

[www.iaea.org/events/international-conference-on-radioactive-waste-management-2021](http://www.iaea.org/events/international-conference-on-radioactive-waste-management-2021)

- ✓ Thank you for the many contributions!
- ✓ Session recordings available through [www!](http://www.iaea.org)
- ✓ Proceedings under development!

# Capturing Knowledge – Publications remain central

## Principles

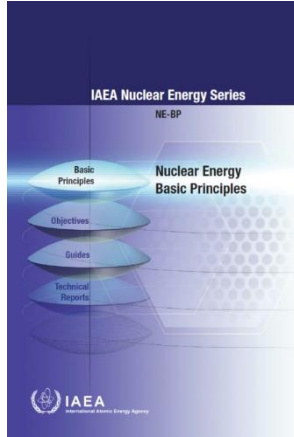

## Objectives

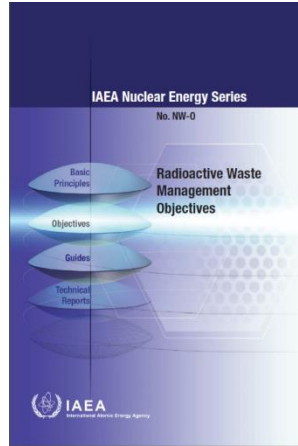

## Guides

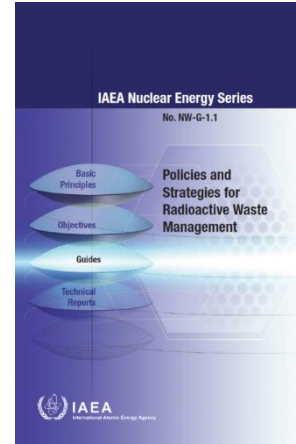

## Technical Reports

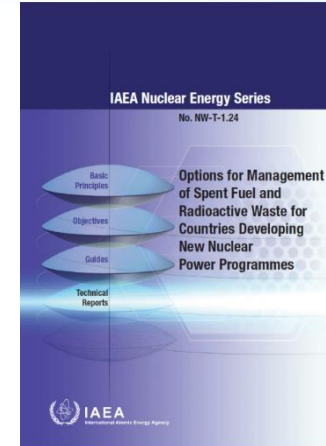

These documents reflect and build upon international experiences and good practices on how radioactive waste management and spent fuel management can be implemented.

The Knowledge captured is presented by way of guidance and examples.

These need to be understood and if necessary adapted to a specific situation, to ensure they can meet all required protection goals (safety, security, safeguards) in a sustainable manner.



# K on RW: Inventories – Characterization – Waste Acceptance Criteria

## Radioactive Waste – A Global Issue

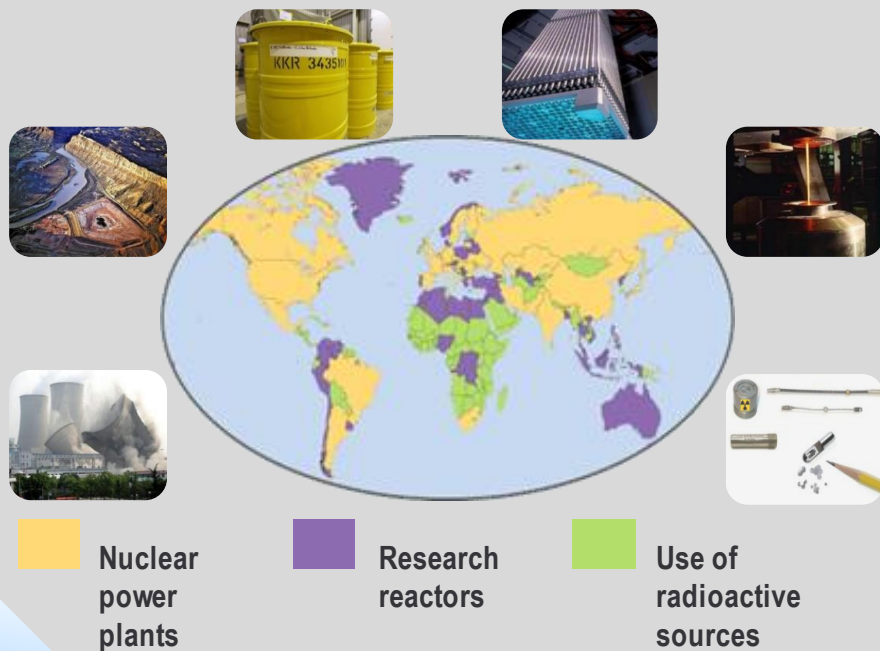

## Global Volume of Solid Radioactive Waste in Storage and Disposal (m3)

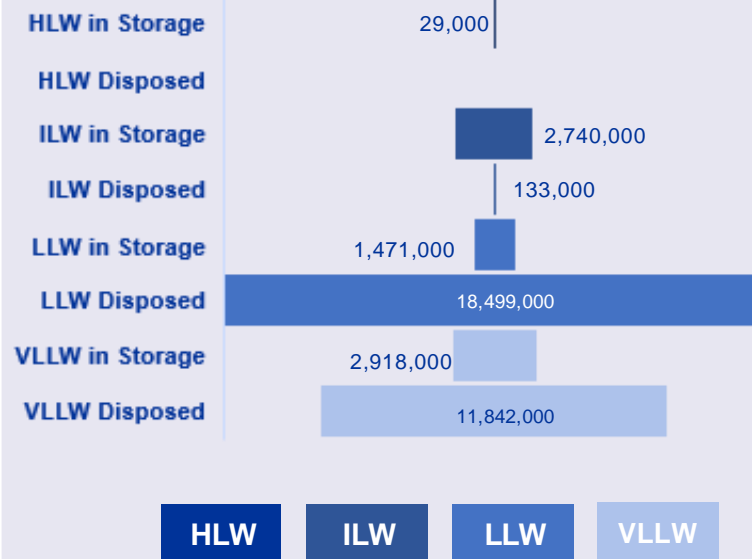

Reported data from 2016 in *Status & Trends in Spent Fuel and Radioactive Waste Management* in publication 2021

## National Inventories – Large/Small/Simple/Complex



# Spent Fuel and Radioactive Waste Information System

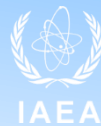

What is the RWM responsibility – nationally, regionally and globally?

SRIS – Launched January 2020

Developed in collaboration with  
EC and OECD/NEA

(<https://sr.is.iaea.org/#/home>)

## Status and Trends in SFM&RWM

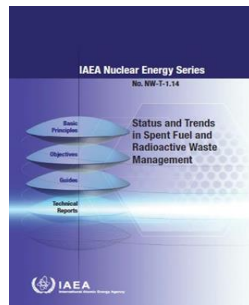

- ✓ Provides an international overview of SF & RW inventories, global status and trends
- ✓ **Prepared in collaboration with MSs, EC, OECD NEA & WNA**
- ✓ 2<sup>nd</sup> Revision currently in publication

Provides visibility of shared challenges & proven solutions

SWIFT – an associated information tool.

# K on RW: Inventory – Characterization – Waste Acceptance Criteria

**CHARACTERIZATION:** The determination of the physical, chemical and radiological properties of the waste to establish the need for further adjustment, treatment, conditioning, or its suitability for further handling, processing, storage or disposal.

The characterization of radioactive waste is the first basic step for waste classification and is important to select appropriate disposal concepts.

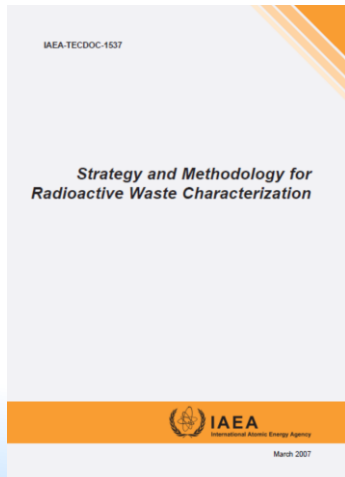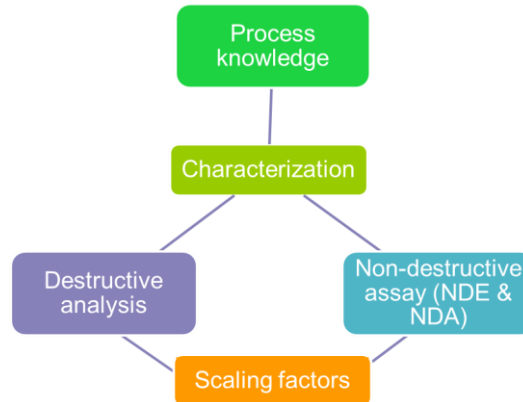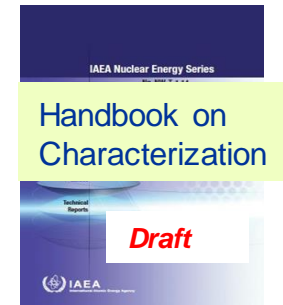

Draft Handbook for publication:  
Characterization of Radioactive  
Waste, Waste Forms and Waste  
Packages

Comprehensive Update

# International Network of Laboratories for Nuclear Waste Characterization LABONET

- Peer network of characterization professionals
- Forum to share knowledge and exchange information
- >150 Members world-wide

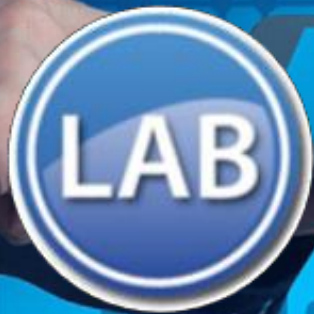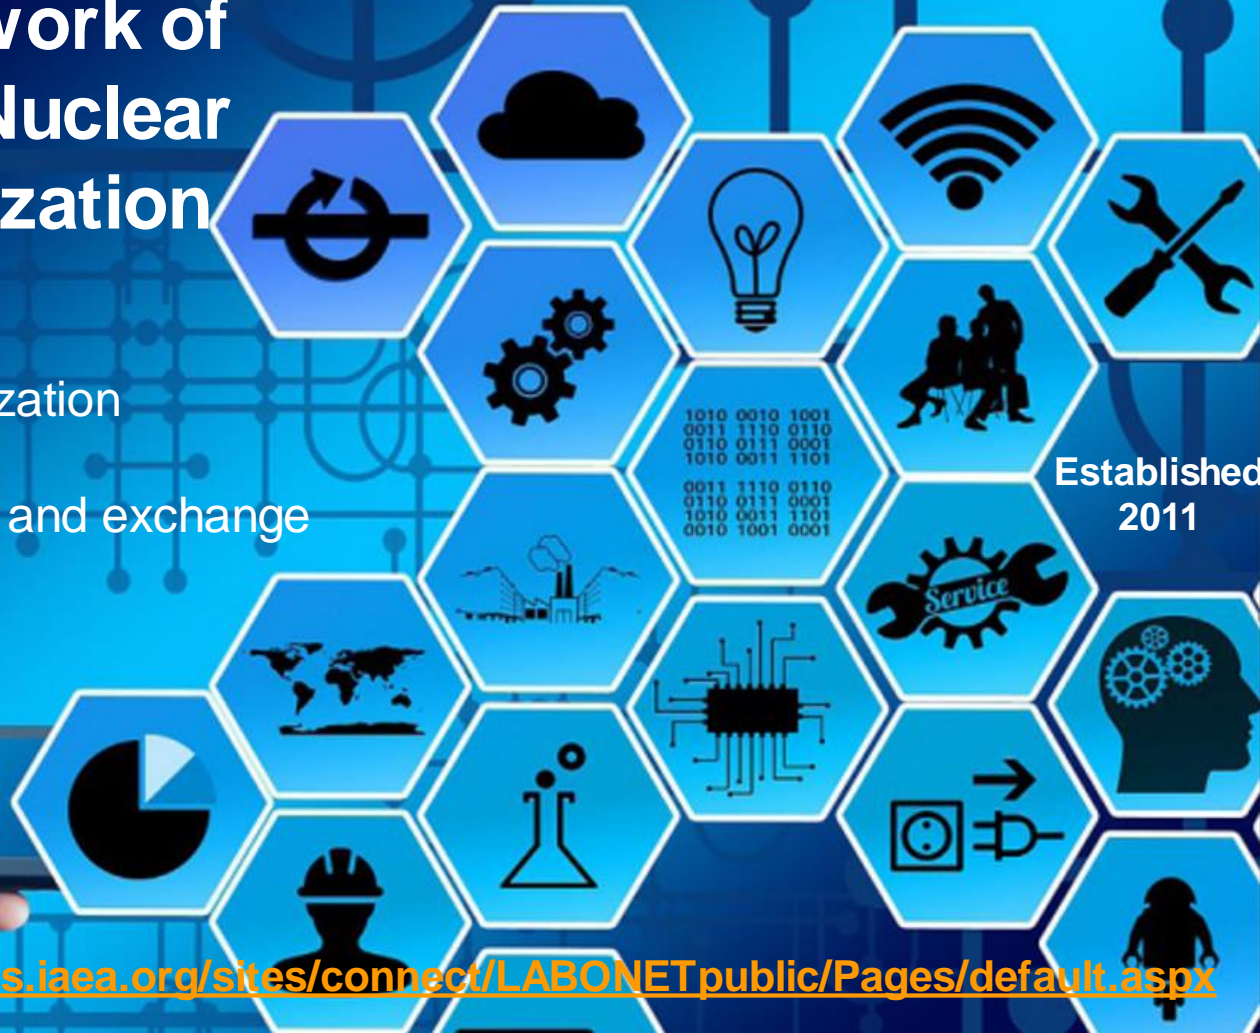

Established  
2011

<https://nucleus.iaea.org/sites/connect/LABONETpublic/Pages/default.aspx>

# K on RW: Inventory – Characterization – Waste Acceptance Criteria

- WAC are quantitative or qualitative criteria, approved by the regulator, for a waste to be accepted by the operator of a processing, storage or disposal facility;
- Specify the radiological, mechanical, physical, chemical & biological characteristics of waste packages or unpackaged waste.

## Why are WAC important?

- Ensure compliance with safety requirements
- Prevent technological problems during processing
- Designed to assist with the selection of appropriate processing and packaging options
- Standardize waste management operations
- Assure waste tracking

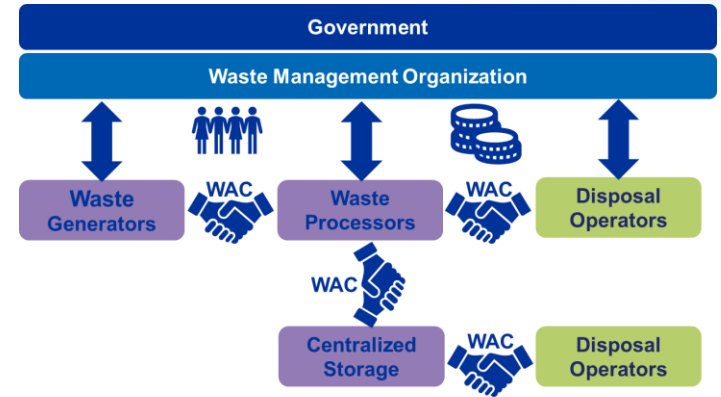

**A draft publication reflects international experience and good practices to establish and use WAC for the cradle-to-grave RWM steps.**

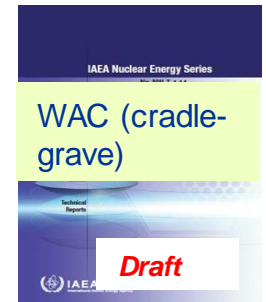

# K on RWM steps – Handbooks for a comprehensive introduction to all main technologies

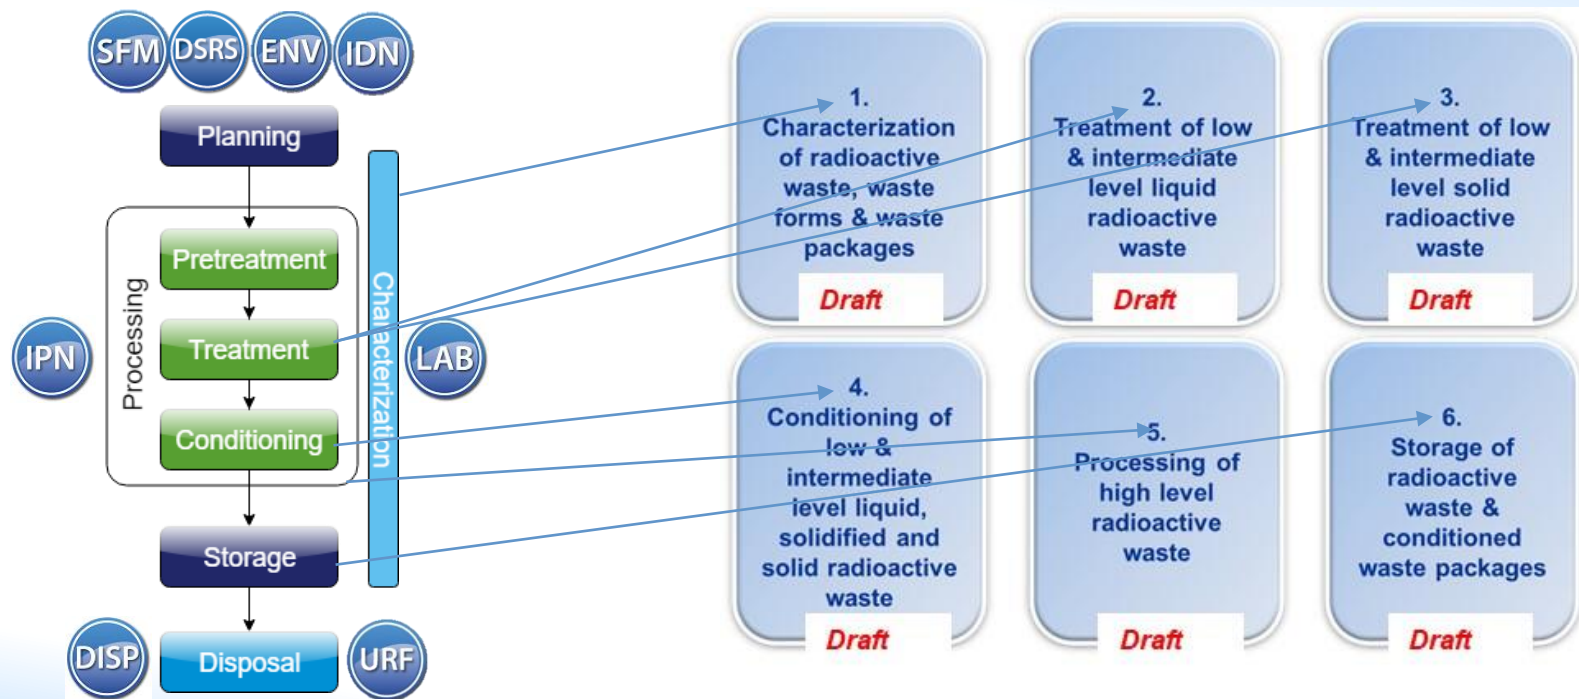

Submitted to publication process.  
Anticipate publication in 2023.



# K on RWM steps – Publications addressing specific topical knowledge

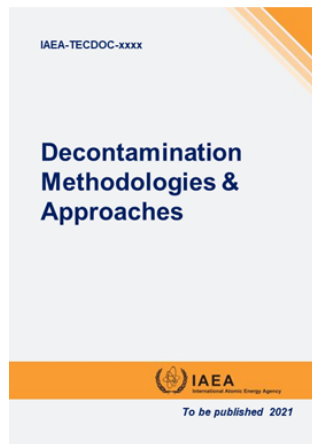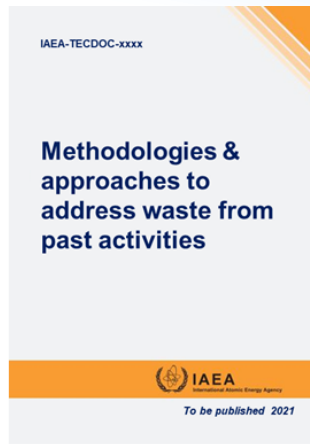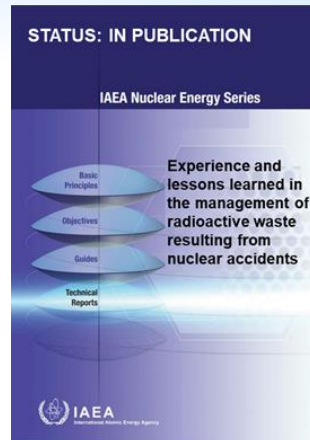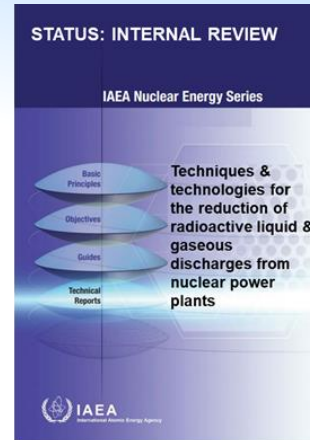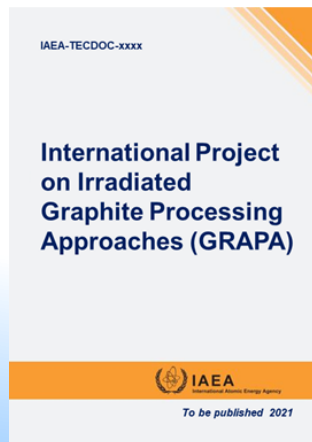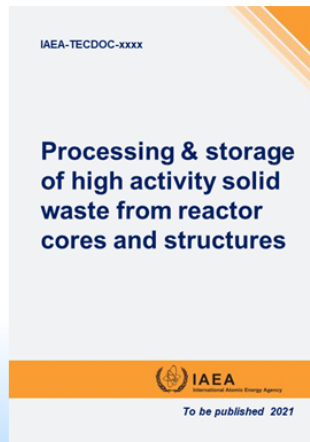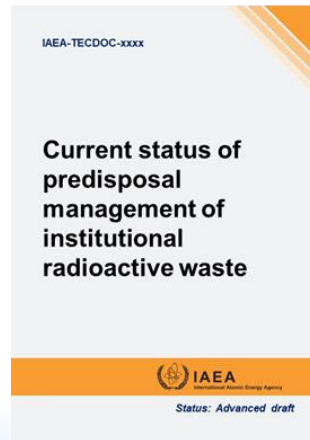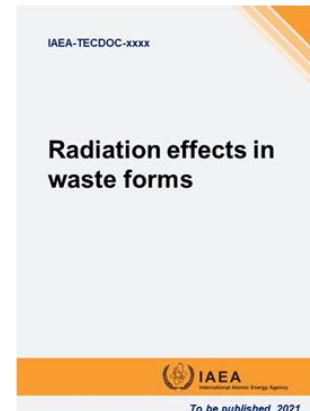

To be published 2021/2022

# K on Disposal – Publications fundamental to inform technical approaches

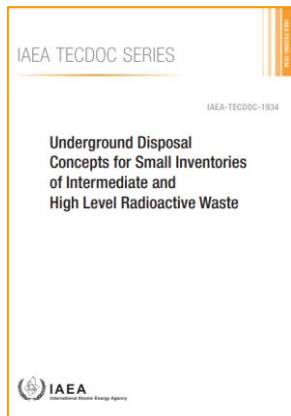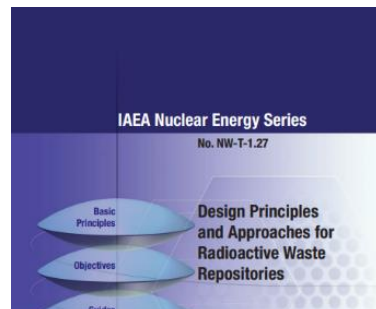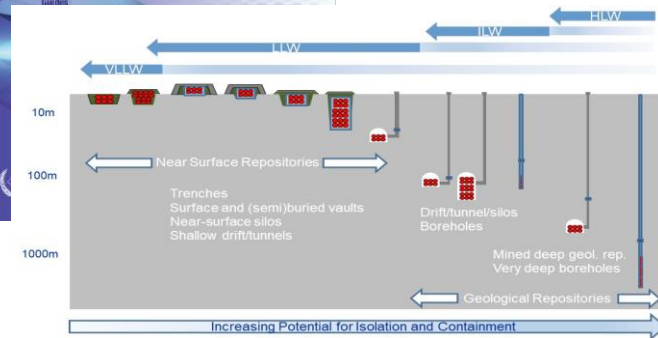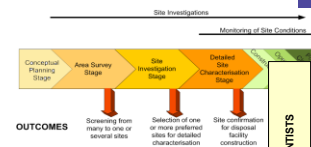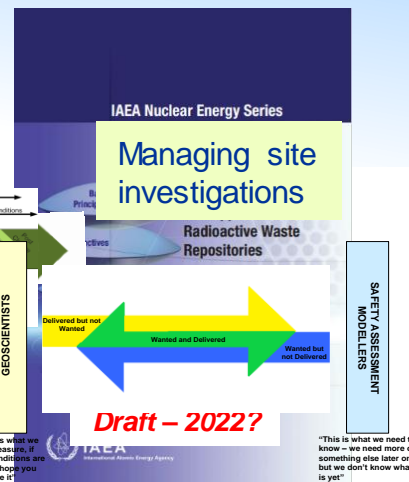

CRP – Borehole Disposal for DSRs

Draft

URF RD&D Compendium

Draft



## Coordinated Research Project

- Targeted first at Disused Sealed Radioactive Sources
- Approach: Standardization and Envelope assessments
- To provide a comprehensive documentary basis developed with the most experienced countries
- To enable Member States to implement more easily their own borehole disposal programme

Addresses the interest of  
100++ Member States!

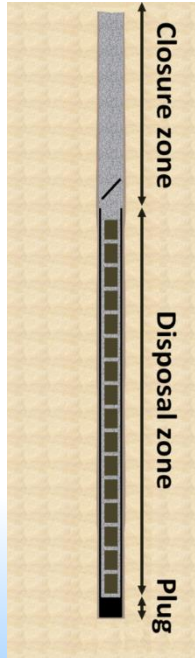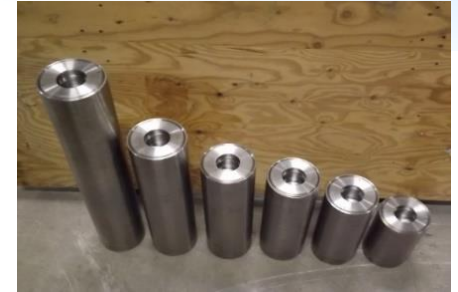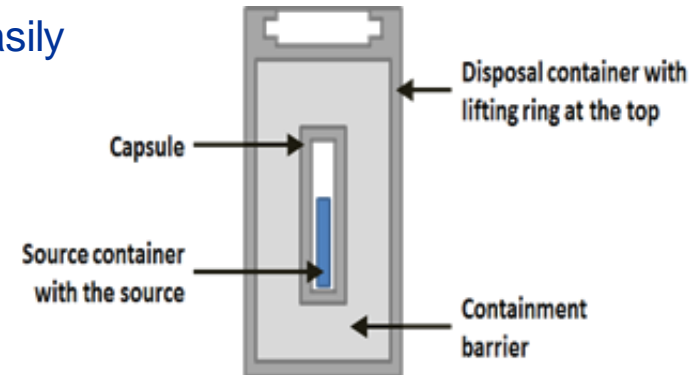

# K on URF RD&D – A global historical overview

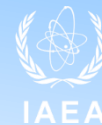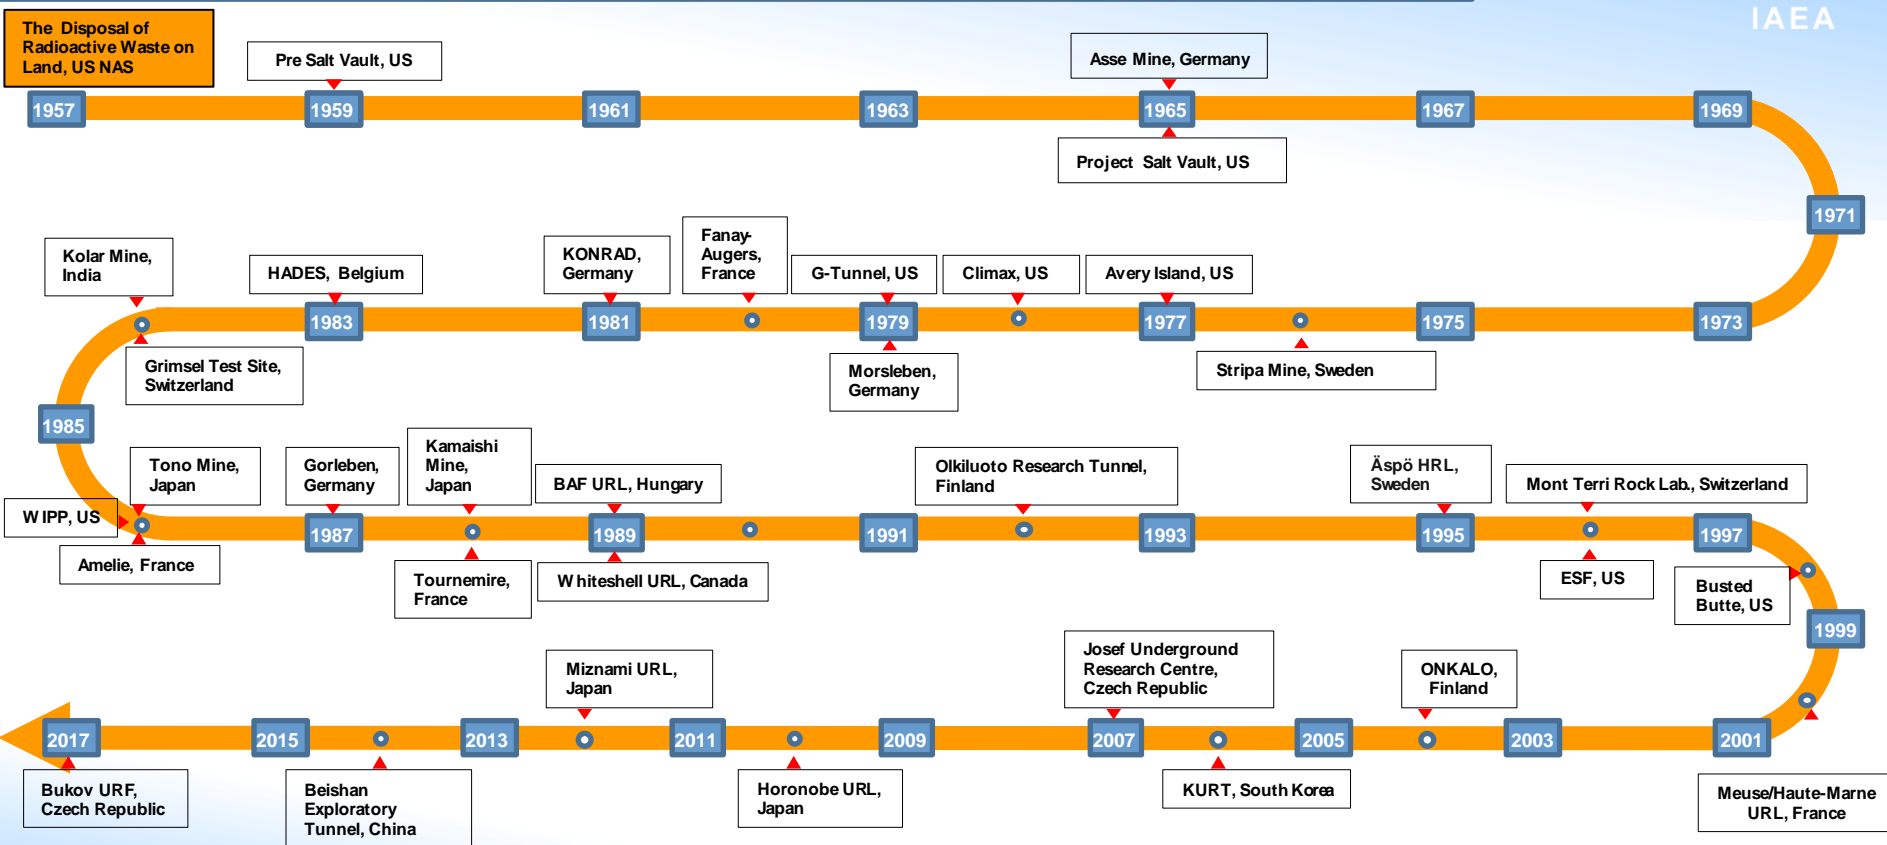

Inform future URF RD&D with program needs and available results

# URF Compendium: Since Pre-Salt Vault, USA, 1959...

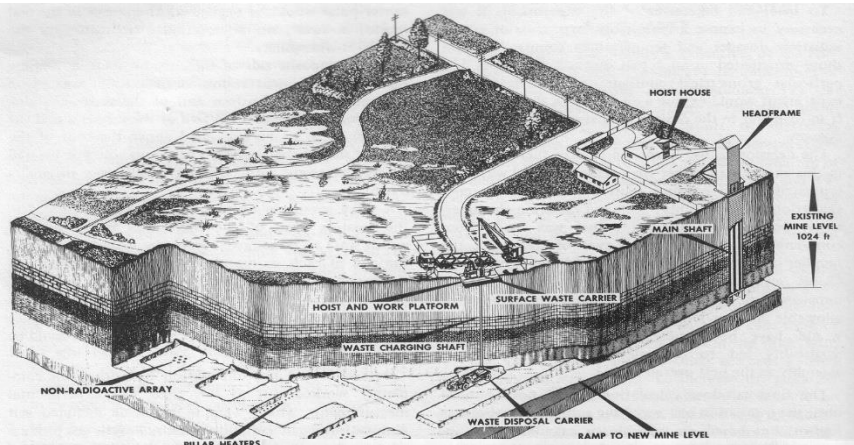

Fig. 14.1.

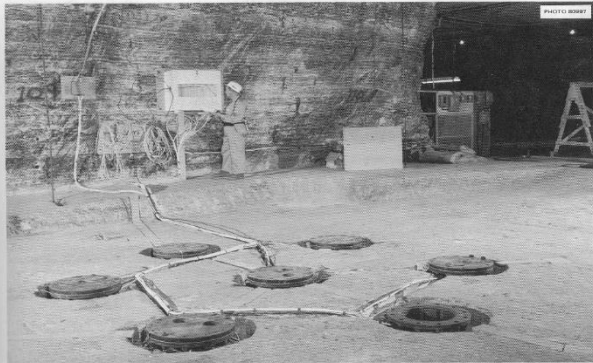

Fig. 8.3. Photo of Array in Room 1 Under Construction, Showing the Off-Gas Tube Bundle and Its Trench.

...60+ years of international  
RD&D in over 15 major  
national DGR programmes

**RD&D relevant to liquid HLW injection**

- **Not recommended due to gas generation and corrosion issues**

# URF Compendium

*A basis to inform future URF RD&D planning*

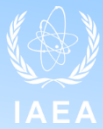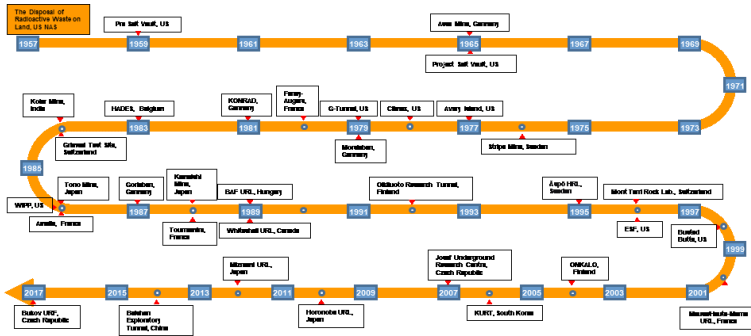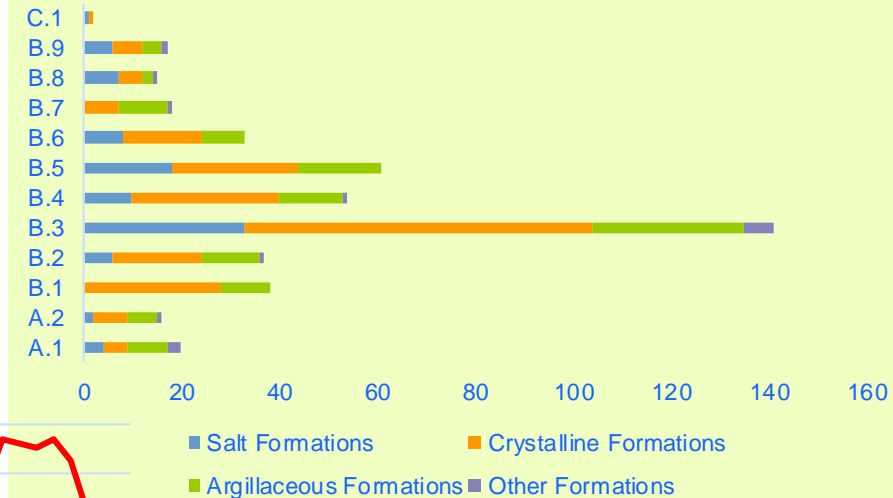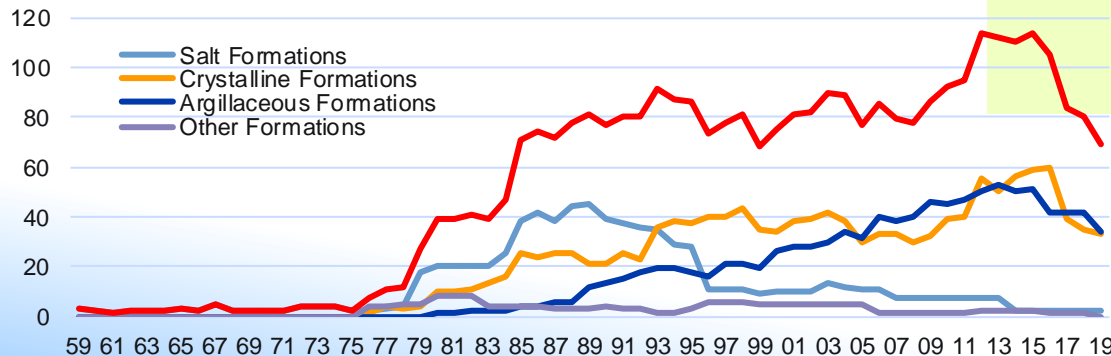

Experiments classified by scope and host formation

Cumulative number of ongoing experiments

# K on Disposal – Publications on topics fundamental to program management

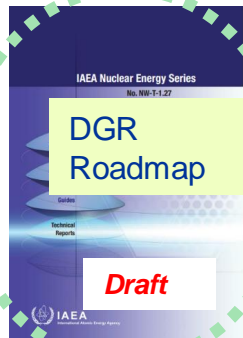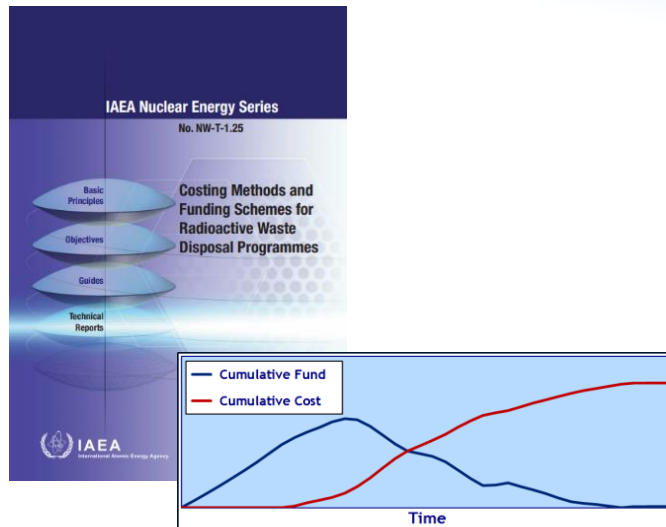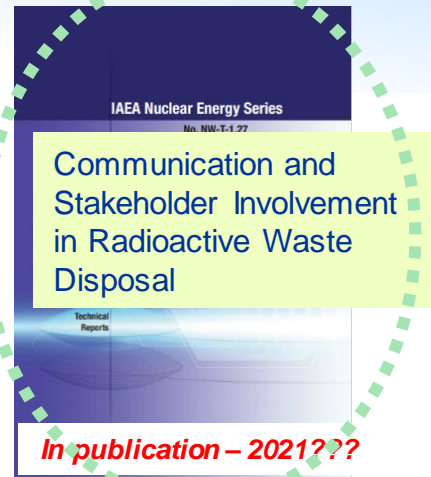

# K on DGR program framework

## Introducing a Generic DGR Roadmap

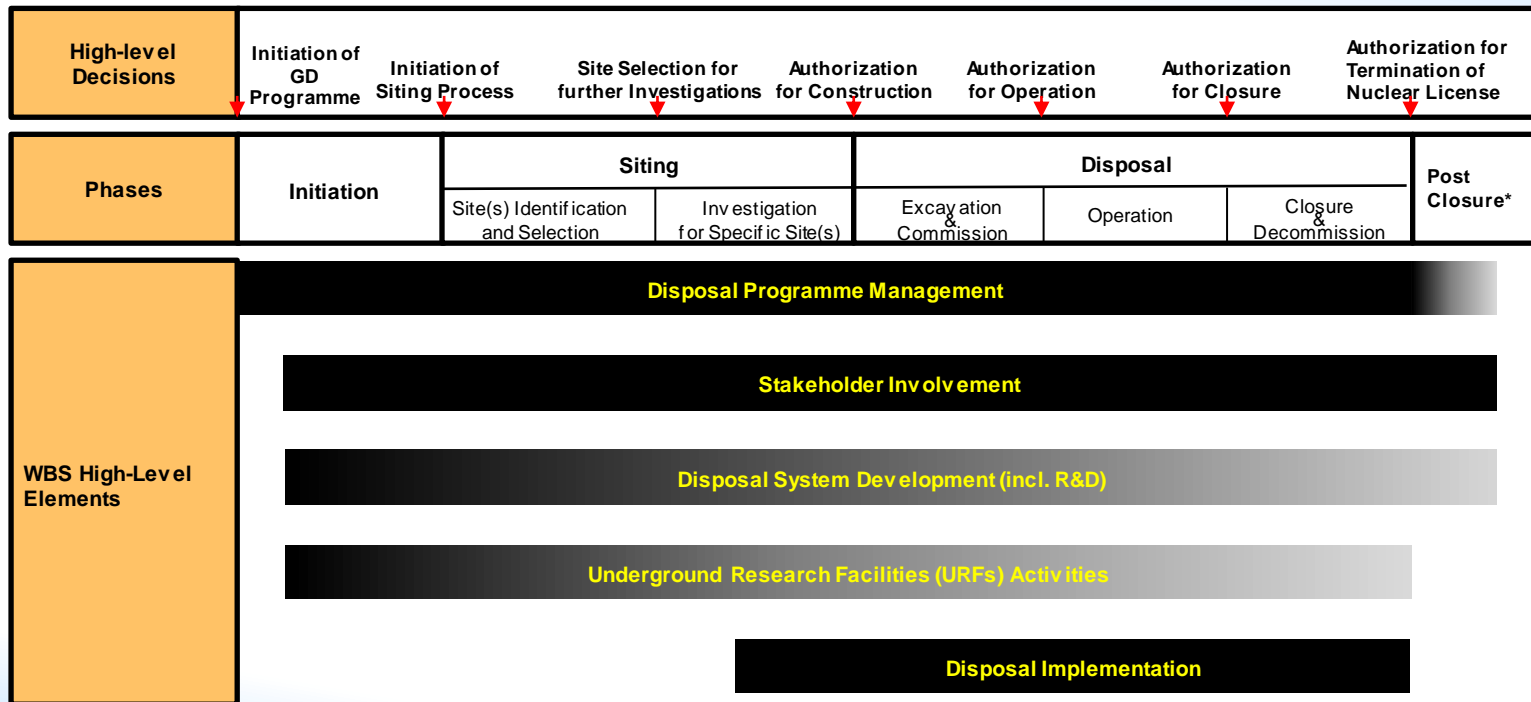

**Program governance: Prepare and inform key decisions - Obtain mandate/framework for next phase**

# K on SI – Publications and other tools capturing international experiences

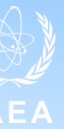

Stakeholder Involvement throughout the lifecycle of nuclear facilities  
Stakeholder Involvement in radioactive waste disposal

NG-T-1.4 (2011)  
Revision in publication

NW-T-1.16  
2021 (or 22?)

Experiences and expectations of local stakeholders to nuclear facilities

NEW PROJECT

Experiences and expectations of local stakeholders to disposal programmes

Draft

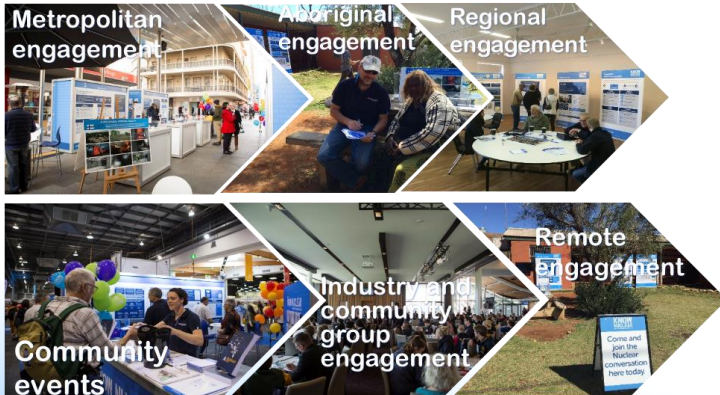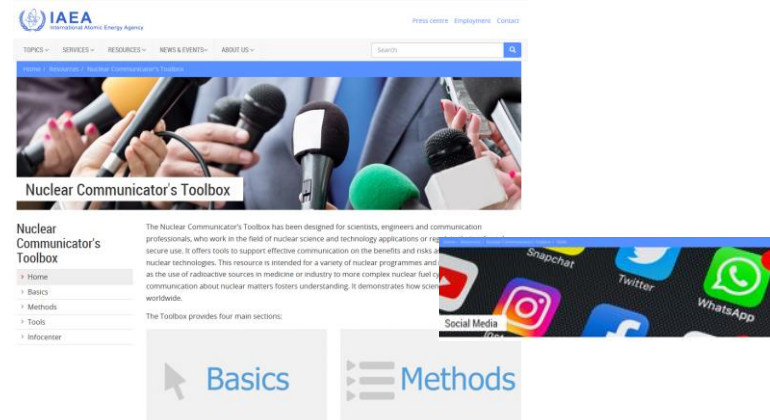

IAEA Nuclear Communicator ToolBox



# eTools for transfer of knowledge

## NuclearWiki, Databases, e-learning, webinars, ....

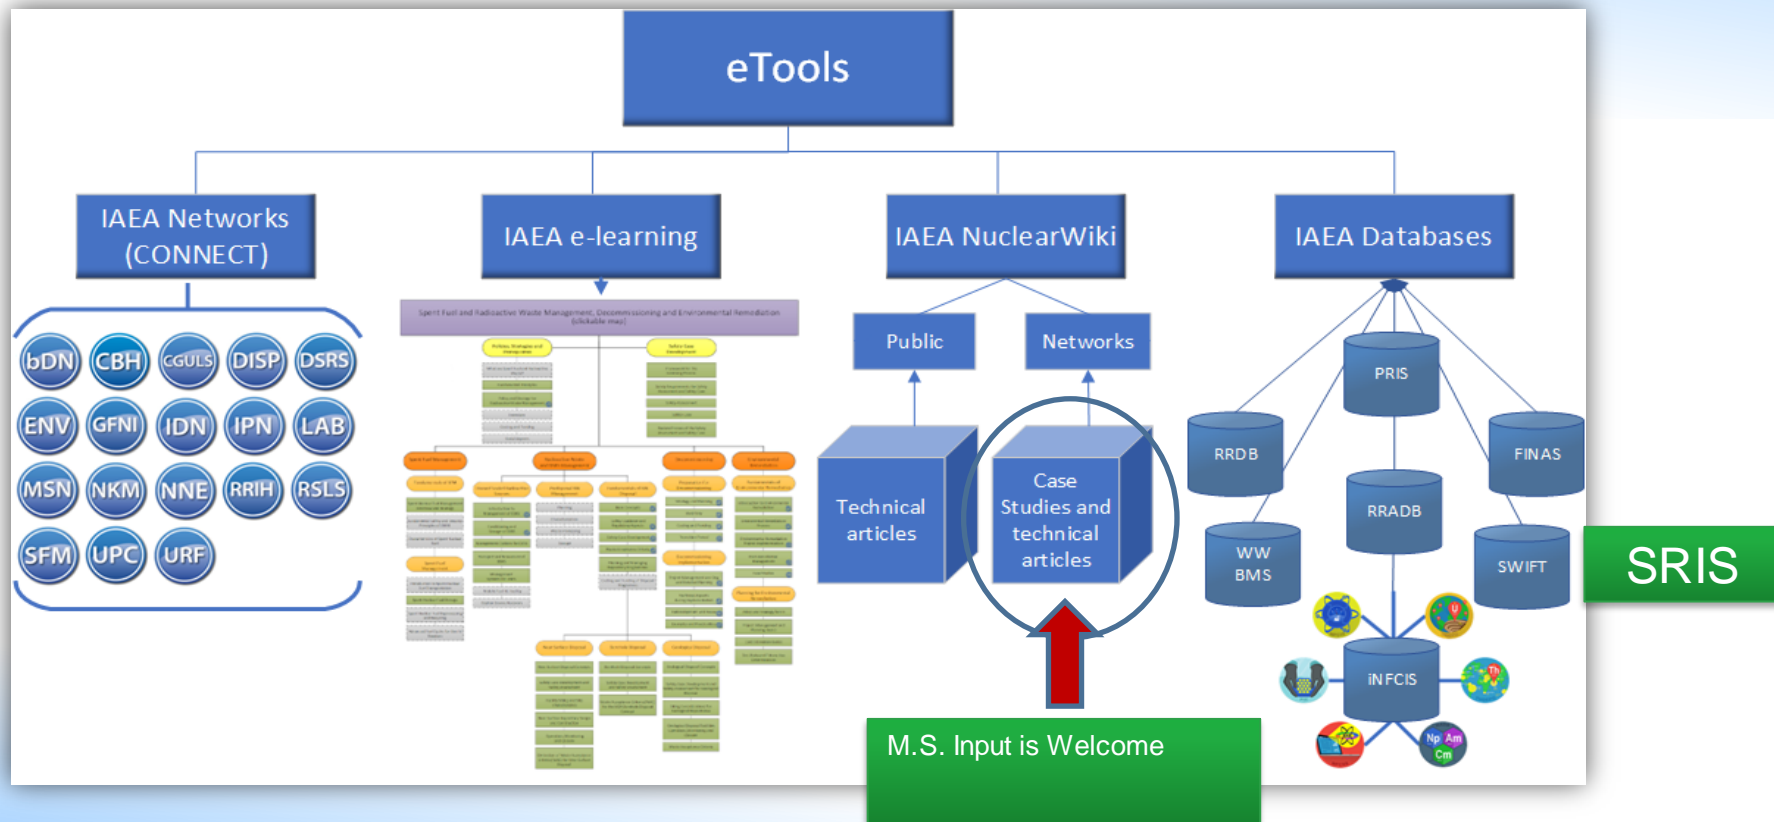

## Wiki – includes all aspects of Backend

- Decommissioning wiki fully function IDN Network
- Currently expanding wiki content to cover all of radioactive waste management
  - Predisposal
  - Disposal
- Type of content:
  - Facilities
  - Technologies
  - Lessons Learned
  - Good practices
  - .....

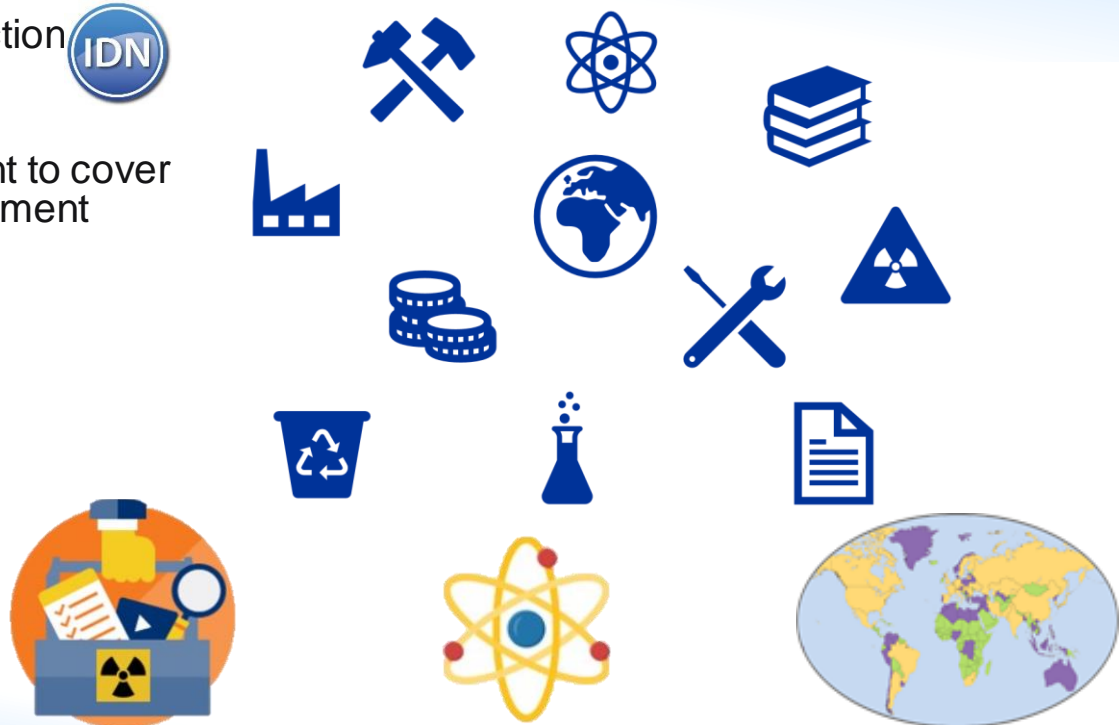

Toolkit for Predisposal

Existing Technologies  
and Practices

Disposal Facilities World-wide

# Developing KM for full national RWM program - what framework?

(The below only a sketch)

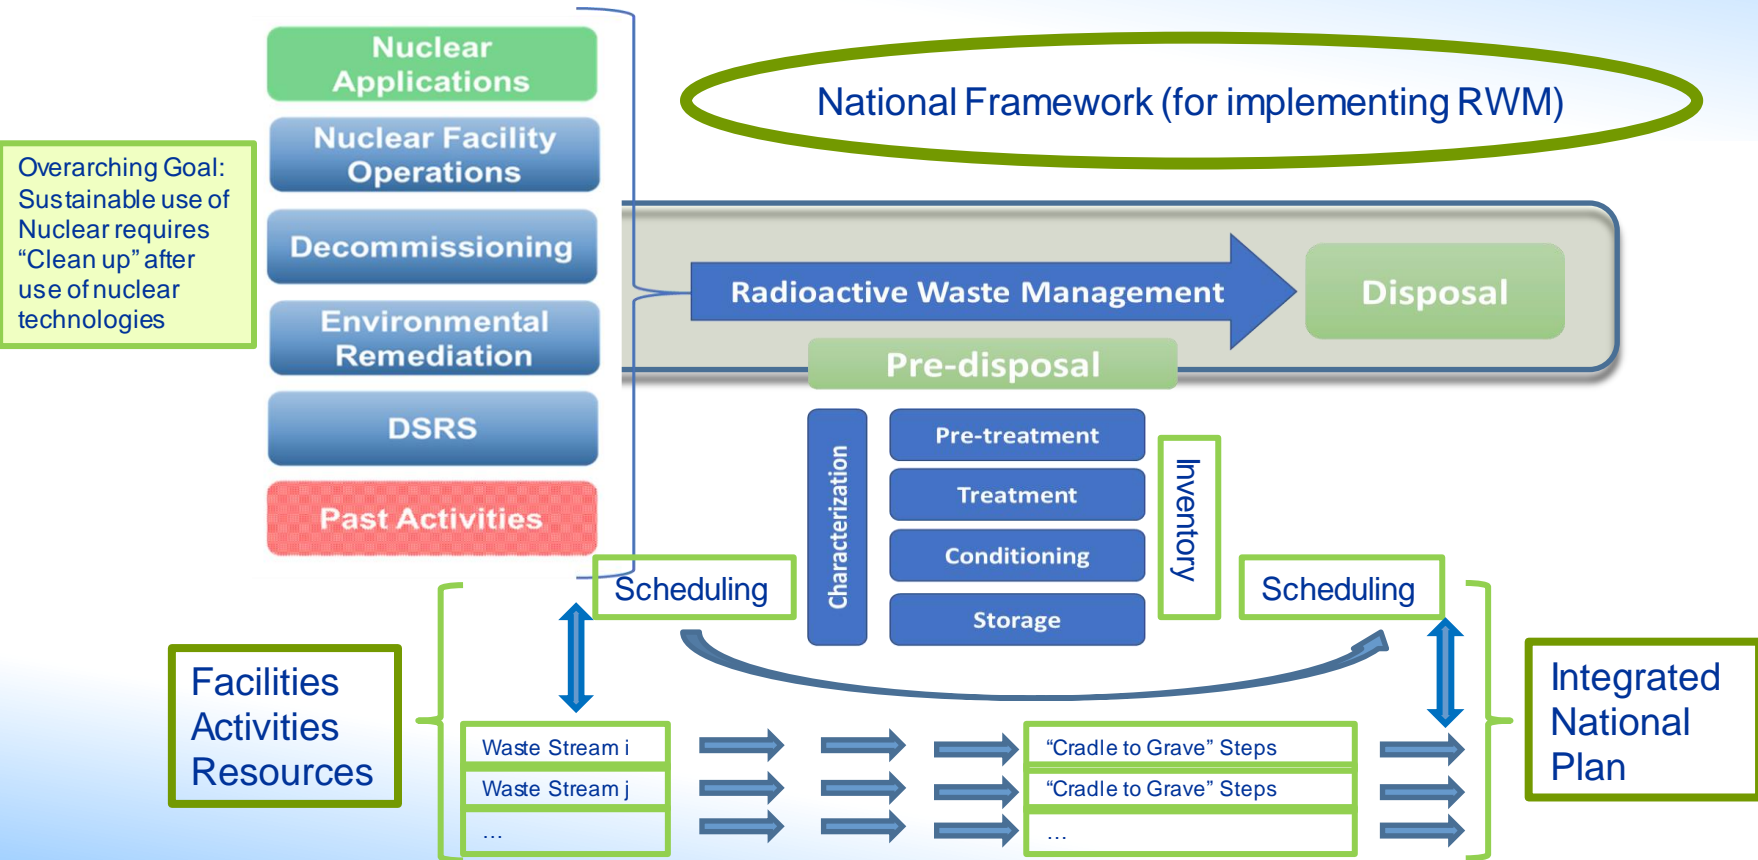

*Thank you!*

*And Stay Connected !*

**Professional Networks – [link](#)**

**eLearning – [link](#)**

**Videos:**

- Two minute - [link](#)
- Ten minute – [link](#)

**Nuclear Communicators'  
Toolbox - [link](#)**
